# Supplementary material for: Water-Soluble Lead Sulfide Nanoparticles: Direct Synthesis and Ligand Exchange Routes
Source: MDPI journal article supplement (doi:10.3390/nano14141235), 2024-07-22
Supplement: s1 [file nanomaterials-3095481-supplementary.pdf › nanomaterials-3095481-supplementary.pdf]

Supplementary materials

# Water-Soluble Lead Sulfide Nanoparticles: Direct Synthesis and Ligand Exchange Routes

Saar Pfeffer <sup>1,2</sup>, Vladimir Ezersky <sup>2</sup>, Sofiya Kolusheva <sup>2</sup> and Yuval Golan <sup>1,2,\*</sup>

<sup>1</sup> Department of Materials Engineering, Ben-Gurion University of the Negev, Beer-Sheva 8410501, Israel; saarpf@post.bgu.ac.il

<sup>2</sup> Ilse Katz Institute for Nanoscale Science and Technology, Ben-Gurion University of the Negev, Beer-Sheva 8410501, Israel; ezersky@bgu.ac.il (V.E.); kolushev@bgu.ac.il (S.K.)

\* Correspondence: ygolan@bgu.ac.il

## S.1. EDS analysis

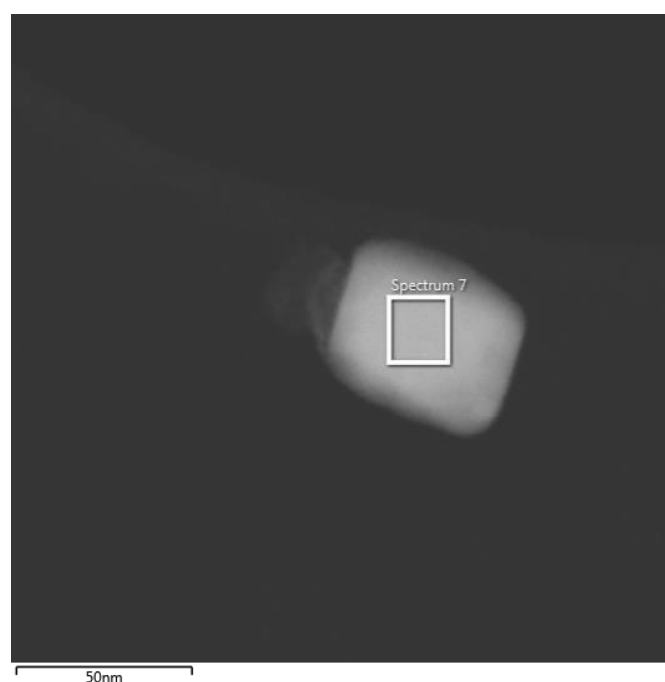

**Figure S1.** Typical STEM image of a PbS nano-cube synthesized directly in presence of PVP.

**Table S1.** Semi-quantitative EDS/STEM analysis from the particle shown in Figure S1.

| Spectrum Label | Spectrum 7 (atomic %) |
|----------------|-----------------------|
| S              | 49                    |
| Pb             | 51                    |
| Total          | 100                   |
